# Supplementary material for: Vaccinating to Protect Others: The Role of Self-Persuasion and Empathy among Young Adults
Source: MDPI journal article supplement (doi:10.3390/vaccines10040553), 2022-04-02
Supplement: s1 [file s1]

**Supplementary Materials to:** Vaccinating to protect others. The role of self-persuasion and empathy among young adults

**Supplementary File 1.** *Polish and English versions of the questionnaires*

**1. Utility beliefs**

**English**

Getting vaccinated against COVID-19 seems to me, to be:

1. very stupid 1 2 3 4 5 6 7 very wise
2. unprotective 1 2 3 4 5 6 7 protective
3. very harmful 1 2 3 4 5 6 7 very beneficial

**Polish**

Zaszczepienie się na COVID-19 wydaje mi się:

1. bardzo głupie 1 2 3 4 5 6 7 bardzo rozsądne
2. nieochraniające 1 2 3 4 5 6 7 bardzo ochraniające
3. bardzo szkodliwe 1 2 3 4 5 6 7 bardzo korzystne

**2. Control beliefs**

**English**

1. If I wanted to, I could go to a medical facility with no problems whatsoever and get vaccinated, when that becomes possible.

completely disagree 1 2 3 4 5 6 7 completely agree

2. It's mostly up to me, whether I get vaccinated against COVID-19 when a vaccine becomes available.

completely disagree 1 2 3 4 5 6 7 completely agree

3. Getting vaccinated against COVID-19 would be for me:

very hard 1 2 3 4 5 6 7 very easy

4. How much control will you have over getting vaccinated against COVID-19?

no control at all 1 2 3 4 5 6 7 full control

**Polish**

1. Gdybym chciał/-a mógłbym/mogłabym bez najmniejszego problemu udać się do placówki medycznej i zaszczepić się przeciw COVID-19, kiedy będzie to już możliwe.

zupełnie się nie zgadzam 1 2 3 4 5 6 7 całkowicie się zgadzam

2. To przede wszystkim do mnie należy decyzja, czy zaszczepię się przeciw COVID-19, kiedy będzie to już możliwe.

zupełnie się nie zgadzam 1 2 3 4 5 6 7 całkowicie się zgadzam

3. Zaszczepienie się przeciw COVID-19, kiedy będzie to już możliwe, byłoby dla mnie:

bardzo trudne 1 2 3 4 5 6 7 bardzo łatwe

4. Jaką kontrolę będziesz miał/a nad zaszczepieniem się na COVID-19?

brak kontroli 1 2 3 4 5 6 7 pełna kontrola

### **3. *Social norm beliefs***

#### **English**

1. Most of the people, who are of importance to me, would praise me for self-vaccinating against COVID-19.
2. Most of the people important to me would probably think I should get vaccinated against COVID-19.
3. People whose opinion I care about would say that it is a good idea for me to get vaccinated against COVID-19.

#### **Polish**

- 1) Większość osób, które są dla mnie ważne, pochwaliłaby mnie za zaszczepienie się na COVID-19.
- 2) Większość ważnych dla mnie ludzi zapewne uznałaby, że powinienem/powinnam zaszczepić się na COVID-19.
- 3) Ludzie, na których opinii mi zależy, stwierdziliby, że to dobry pomysł, abym za zaszczepił się na COVID-19.

### **4. *Moral norm beliefs***

#### **English**

1. I feel personally accountable for reducing the risk of infecting others during the COVID-19 pandemic by self-vaccinating.
2. Getting vaccinated against COVID-19 should be a moral obligation for all people.
3. Responsible behavior toward others, especially the sick and elderly, requires that I get vaccinated against COVID-19 when that becomes possible.

#### **Polish**

- 1) Czuję się osobiście odpowiedzialny/a za ograniczenie ryzyka zakażenia innych osób poprzez za zaszczepienie się na COVID-19, kiedy będzie to już możliwe.
- 2) Zaszczepienie się na COVID-19 powinno być moralnym obowiązkiem wszystkich ludzi.
- 3) Odpowiedzialne zachowanie wobec innych osób, zwłaszcza osób chorych i starszych, wymaga abym zaszczepił się na COVID-19, kiedy będzie to już możliwe

### **5. *Vaccination intention***

#### **English**

When the COVID-19 vaccine becomes available I intend to:

1. Search for information as of where, when and how I can get vaccinated against COVID-19.
2. Make an appointment at a medical facility in order to get vaccinated against COVID-19.
3. Vaccinate myself against COVID-19.

#### **Polish**

Gdy będzie dostępna szczepionka na koronawirusa zamierzam:

1. Poszukać informacji na temat tego, gdzie, kiedy i w jaki sposób mogę zaszczepić się przeciw COVID-19
2. Umówić się na wizytę w placówce medycznej w celu zaszczepienia się przeciw COVID-19.
3. Zaszczepić się przeciw COVID-19.

**Supplementary File 2** *Experimental manipulation and control in Study 1 in Polish and English*

- a. Direct persuasion

**Polish**

Głównym celem badania jest opracowanie listy przekonujących argumentów na rzecz zaszczepienia się przeciw COVID-19, które mogą być zastosowane w przyszłości do zachęcania ludzi do szczepienia się, kiedy będzie już dostępna na rynku darmowa i skuteczna szczepionka.

Państwa oceny zostaną wykorzystane w celu wyselekcjonowania najbardziej przekonującego argumentu.

Bardzo prosimy o uważne zapoznanie się dwoma argumentami stworzonymi przez Światową Organizację Zdrowia (WHO) zachęcającymi do zaszczepiania się przeciw COVID-19, kiedy będzie już dostępna na rynku darmowa i skuteczna szczepionka. Prosimy o ocenę, w jakim stopniu zgadzasz się z podanymi argumentami, posługując się następującą skalą, gdzie:

- 1 – zupełnie się nie zgadzam
- 2 – nie zgadzam się
- 3 – raczej nie zgadzam się
- 4 – ani się zgadzam ani się nie zgadzam
- 5 – raczej zgadzam się
- 6 – zgadzam się
- 7 – całkowicie się zgadzam

1. Chorując bezobjawowo na COVID-19, nie wiemy, że jesteśmy chorzy, ale możemy zarażać inne osoby. Dlatego szczepiąc się chronimy zdrowie starszych członków naszej rodziny (np. babci, dziadka), których widzimy.
2. Szczepienie się chroni przed zachorowaniem na COVID-19. Nawet osoby młode, lekko przechodząc zachorowanie na COVID-19, są narażone na poważne powikłania, jak niewydolność serca.

**English**

The main goal of this study is to develop a list of compelling arguments in favour of getting vaccinated against COVID-19. The arguments might be used in the future to encourage people to get vaccinated when a free and effective vaccine is available.

Your evaluations will be used to select the most persuasive argument.

Please read carefully the two arguments created by the World Health Organization (WHO) encouraging vaccination against COVID-19 when a free and effective vaccine becomes available. Please rate the extent to which you agree with those arguments using the following scale, where:

- 1 - I completely disagree
- 2 - I do not agree
- 3 - I rather disagree
- 4 - I neither agree nor disagree
- 5 - I rather agree
- 6 - I agree
- 7 - I completely agree

1. By becoming asymptotically sick for COVID-19, we do not know whether we are sick, but we can infect others. Therefore, by getting vaccinated, we protect the health of older members of our family (e.g., grandmother, grandfather), with whom we meet.
2. Getting vaccinated protects against contracting COVID-19. Even young people who usually are only mildly affected by COVID-19 are at risk for serious complications, such as heart failure.

b. Experimental group: self

### **Polish**

Głównym celem badania jest opracowanie listy przekonujących argumentów na rzecz zaszczepienia się przeciw COVID-19, które mogą być zastosowane w przyszłości do zachęcania ludzi do szczepienia się, kiedy będzie już dostępna na rynku darmowa i skuteczna szczepionka.

Bardzo prosimy o samodzielne wymyślenie i napisanie co najmniej dwóch mocnych argumentów na rzecz zaszczepiania się przeciw COVID-19, kiedy będzie już dostępna na rynku darmowa i skuteczna szczepionka. Argumenty powinny dotyczyć wyłącznie ochrony zdrowia osoby szczepiącej się (a nie jej otoczenia społecznego).

Przykładowy argument:

Szczepienie się chroni przed zachorowaniem na COVID-19. Nawet osoby młode, lekko przechodząc zachorowanie na COVID-19, są narażone na poważne powikłania, jak niewydolność serca.

Stworzone przez Państwa argumenty zostaną ocenione przez przeszkolone osoby w celu wyselekcjonowania najbardziej przekonujących argumentów.

### **English**

The main goal of this study is to develop a list of compelling arguments in favour of getting vaccinated against COVID-19. The arguments might be used in the future to encourage people to get vaccinated when a free and effective vaccine is available.

Please think independently of at least two strong arguments in favour of getting vaccinated against COVID-19 when a free and effective vaccine is available, and write them down. The arguments should only concern protecting the health of the person getting vaccinated (not their social environment).

Example:

Getting vaccinated protects against contracting COVID-19. Even young people who usually are only mildly affected by COVID-19 are at risk for serious complications, such as heart failure.

Your arguments will be evaluated by trained individuals to select the most persuasive arguments.

c. Experimental group: others

**Polish**

Głównym celem badania jest opracowanie listy przekonujących argumentów na rzecz zaszczepienia się przeciw COVID-19, które mogą być zastosowane w przyszłości do zachęcania ludzi do szczepienia się, kiedy będzie już dostępna na rynku darmowa i skuteczna szczepionka.

Bardzo prosimy o samodzielne wymyślenie i napisanie co najmniej dwóch mocnych argumentów na rzecz zaszczepiania się przeciw COVID-19, kiedy będzie już dostępna na rynku darmowa i skuteczna szczepionka. Argumenty powinny dotyczyć wyłącznie ochrony zdrowia innych osób, niż osoba szczepiąca się (nie jej zdrowia), np. tych które nie będą mogły zaszczepić się (osoby starsze, chore, niemowlęta).

Przykładowy argument:

Chorując bezobjawowo na COVID-19, nie wiemy, że jesteśmy chorzy, ale możemy zarażać inne osoby. Dlatego szczepiąc się, chronimy zdrowie starszych członków naszej rodziny (np. babci, dziadka), których widzimy.

Stworzone przez Państwa argumenty zostaną ocenione przez przeszkolone osoby w celu wyselekcjonowania najbardziej przekonujących argumentów.

**English**

The main goal of this study is to develop a list of compelling arguments in favour of getting vaccinated against COVID-19. The arguments might be used in the future to encourage people to get vaccinated when a free and effective vaccine is available.

Please think independently of at least two strong arguments in favour of getting vaccinated against COVID-19 when a free and effective vaccine is available, and write them down. The arguments should only concern protecting the health of people other than the one getting the vaccine. For instance those who cannot be vaccinated (old people, sick people, infants)

Example:

By becoming asymptotically sick for COVID-19, we do not know whether we are sick, but we can infect others. Therefore, by getting vaccinated, we protect the health of older members of our family (e.g., grandmother, grandfather), with whom we meet.

Your arguments will be evaluated by trained individuals to select the most persuasive arguments.

**Supplementary File 3** *Experimental manipulation in Study 2 in Polish and English*

**A. Instructions:**

**a. Polish**

**Ocena grafik informujących o szczepieniach przeciw koronawirusowi**

Głównym celem badania jest ocena grafik informacyjnych związanych z możliwością zaszczepienia się przeciw COVID-19 (koronawirusowi), które mogą być zastosowane w przyszłości, kiedy zostanie stworzona skuteczna i darmowa szczepionka przeciw koronawirusowi. Prosimy, wybierz jedną z dwóch poniżej prezentowanych grafik, która - według Ciebie - jest bardziej estetyczna i dopasowana do treści komunikatu.

[GRAFIKA; możliwość wyboru preferowanej grafiki]

### **Uwarunkowania gotowości do zaszczepienia się przeciw koronawirusowi**

Celem drugiej części tego badania jest określenie czynników psychologicznych wpływających na gotowość do zaszczepienia się przeciw koronawirusowi (COVID-19), kiedy zostanie opracowana skuteczna i darmowa szczepionka.

#### **b. English**

#### **Evaluation of coronavirus vaccination infographics**

The primary purpose of this research is to evaluate infographics related to the COVID-19 (coronavirus) vaccination. Those infographics will be used in the future when an effective and free coronavirus vaccine is developed. Please select one of the two graphics below that you feel is more aesthetically pleasing and best matches the comment on the graphic.

[IMAGE; choice of the preferred graphic]

#### **Determinants of willingness to vaccinate against coronavirus**

The purpose of the second part of this study is to determine the psychological factors influencing willingness to be vaccinated against coronavirus (COVID-19) when an effective and free vaccine is developed.

#### **B. Graphics:**

##### **a. Direct persuasion**

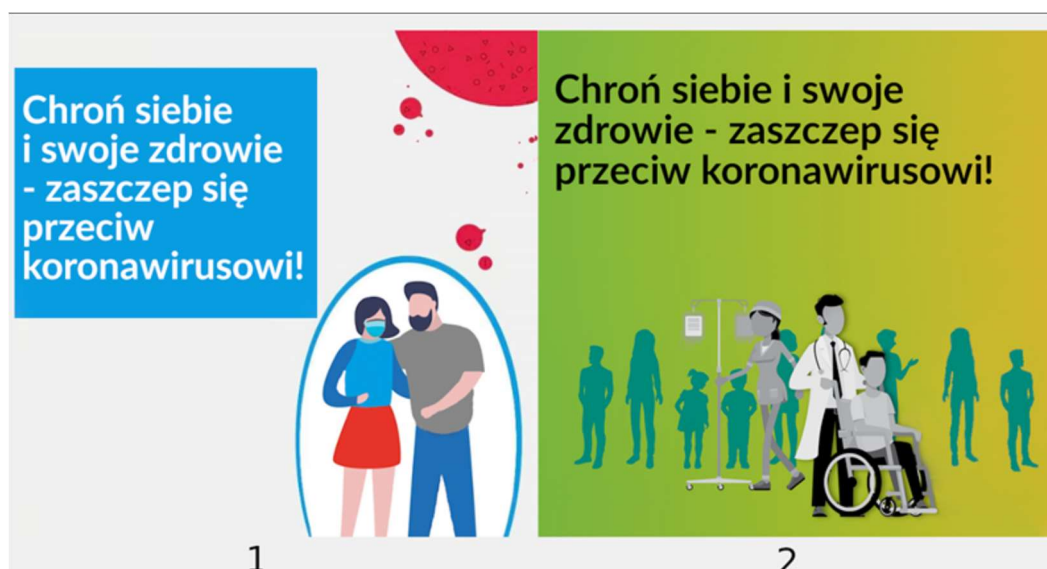

**English:** Protect yourself and your own health - take the coronavirus vaccine!

b. Manipulation focused on health of others

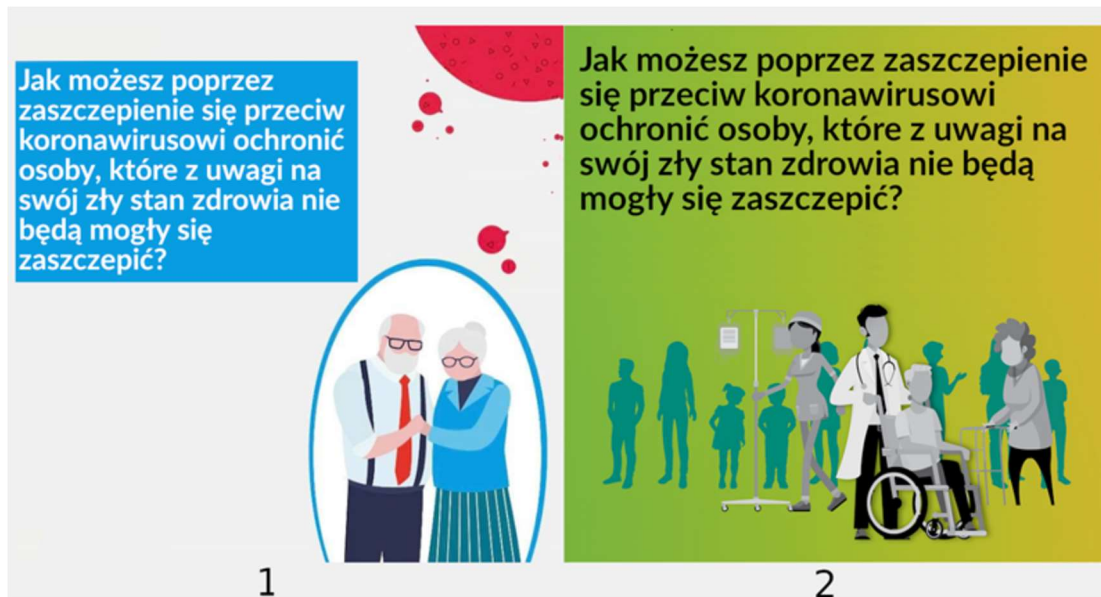

**English:** How can you protect other people, especially those who cannot take the vaccine due to health problems, through vaccinating?

**Supplementary File 4 Tables**

**Supplementary Table 1**

*Descriptive statistics for each group in Study 1*

| Measure                | Experimental group: others |           | Experimental group: self |           | Direct persuasion |           |
|------------------------|----------------------------|-----------|--------------------------|-----------|-------------------|-----------|
|                        | <i>M</i>                   | <i>SD</i> | <i>M</i>                 | <i>SD</i> | <i>M</i>          | <i>SD</i> |
| 1. Empathy             | 3.48                       | .70       | 3.34                     | .65       | 3.36              | .69       |
| 2. Intention           | 5.51                       | 1.75      | 4.99                     | 2.18      | 5.01              | 1.93      |
| 3. Utility beliefs     | 5.76                       | 1.18      | 5.12                     | 1.82      | 5.16              | 1.67      |
| 4. Control beliefs     | 5.28                       | 1.38      | 5.16                     | 1.65      | 5.06              | 1.51      |
| 5. Social norm beliefs | 5.06                       | 1.74      | 4.72                     | 1.92      | 4.48              | 1.81      |
| 6. Moral norm beliefs  | 5.42                       | 1.60      | 4.76                     | 2.11      | 4.76              | 1.92      |
| 7. Sex                 | .24                        | .44       | .20                      | .46       | .20               | .42       |
| 8. K-COVID-19          | .80                        | .72       | .70                      | .72       | .53               | .67       |

**Supplementary Table 2**

*Means, standard deviations and factor loading for all items in Study 1*

| Factor  | Item | Mean | SD   | Factor Loading |               |             |
|---------|------|------|------|----------------|---------------|-------------|
|         |      |      |      | CFA            | Initial Model | Final Model |
| Empathy | EM1  | 3.94 | .96  | .502           | -             | -           |
|         | EM2  | 4.10 | .83  | .229           | -             | -           |
|         | EM3  | 3.60 | 1.22 | .514           | .705          | .706        |
|         | EM4  | 3.97 | .83  | .212           | -             | -           |
|         | EM5  | 3.45 | 1.11 | .572           | .606          | .606        |
|         | EM6  | 3.96 | 1.00 | .564           | .365          | .365        |
|         | EM7  | 3.88 | 1.16 | .570           | .406          | .406        |

|                     |      |      |      |      |      |      |
|---------------------|------|------|------|------|------|------|
|                     | EM8  | 3.53 | 1.20 | .511 | .660 | .659 |
|                     | EM9  | 4.13 | .94  | .308 | -    | -    |
|                     | EM10 | 3.83 | 1.02 | .651 | .441 | .441 |
|                     | EM11 | 1.76 | .79  | .123 | -    | -    |
|                     | EM12 | 2.54 | 1.03 | .339 | -    | -    |
|                     | EM13 | 3.20 | 1.22 | .457 | .643 | .643 |
|                     | EM14 | 3.58 | 1.03 | .295 | -    | -    |
|                     | EM15 | 2.07 | 1.02 | .333 | -    | -    |
|                     | EM16 | 4.03 | .79  | .182 | -    | -    |
|                     | EM17 | 3.06 | 1.05 | .317 | .523 | .524 |
|                     | EM18 | 2.96 | 1.23 | .211 | .403 | .403 |
|                     | EM19 | 3.01 | 1.12 | .244 | -    | -    |
|                     | EM20 | 2.55 | 1.20 | .427 | .479 | .479 |
|                     | EM21 | 3.52 | 1.43 | .665 | .582 | .582 |
| Intention           | I1   | 5.46 | 1.93 | .875 | .871 | .871 |
|                     | I2   | 5.02 | 2.04 | .976 | .977 | .977 |
|                     | I3   | 5.11 | 2.08 | .987 | .990 | .990 |
| Utility beliefs     | U1   | 5.62 | 1.73 | .972 | .972 | .972 |
|                     | U2   | 5.26 | 1.68 | .854 | .853 | .851 |
|                     | U3   | 5.25 | 1.91 | .844 | .848 | .847 |
| Control beliefs     | C1   | 5.25 | 1.86 | .828 | .869 | .873 |
|                     | C2   | 5.70 | 1.52 | .251 | -    | -    |
|                     | C3   | 5.04 | 1.89 | .827 | .893 | .897 |
|                     | C4   | 5.22 | 1.68 | .411 | .436 | .438 |
| Social norm beliefs | S1   | 4.77 | 1.86 | .902 | .894 | .894 |
|                     | S2   | 4.69 | 1.90 | .953 | .954 | .954 |
|                     | S3   | 4.83 | 1.96 | .963 | .969 | .969 |
| Moral norm beliefs  | M1   | 5.05 | 1.91 | .900 | -    | -    |
|                     | M2   | 4.72 | 2.08 | .899 | -    | -    |
|                     | M3   | 5.27 | 2.00 | .846 | -    | -    |

**Supplementary Table 3**

*Means, standard deviations and factor loading for all items in Study 2*

| Factor              | Item | Mean | SD   | Factor Loading |               |             |
|---------------------|------|------|------|----------------|---------------|-------------|
|                     |      |      |      | CFA            | Initial Model | Final Model |
| Intention           | I1   | 5.36 | 1.87 | .866           | .852          | .852        |
|                     | I2   | 4.90 | 2.02 | .943           | .956          | .956        |
|                     | I3   | 5.05 | 2.06 | .987           | .987          | .987        |
| Utility beliefs     | U1   | 5.55 | 1.78 | .970           | -             | -           |
|                     | U2   | 5.20 | 1.66 | .862           | -             | -           |
|                     | U3   | 5.18 | 1.76 | .872           | -             | -           |
| Control beliefs     | C1   | 5.36 | 1.75 | .719           | .767          | .767        |
|                     | C2   | 5.83 | 1.40 | .293           | -             | -           |
|                     | C3   | 5.14 | 1.66 | .834           | .920          | .922        |
|                     | C4   | 5.53 | 1.48 | .216           | -             | -           |
| Social norm beliefs | S1   | 4.84 | 1.83 | .906           | .903          | .903        |
|                     | S2   | 4.80 | 1.86 | .900           | .911          | .911        |
|                     | S3   | 4.95 | 1.90 | .987           | .981          | .981        |
|                     | M1   | 5.12 | 1.88 | .922           | -             | -           |



|                    |    |      |      |      |   |   |
|--------------------|----|------|------|------|---|---|
| Moral norm beliefs | M2 | 4.67 | 2.06 | .919 | - | - |
|                    | M3 | 5.19 | 1.97 | .956 | - | - |

**Supplementary Table 4**

*Descriptive statistics for each group in Study 2*

| Measure                | Self-persuasion |           | Direct persuasion |           |
|------------------------|-----------------|-----------|-------------------|-----------|
|                        | <i>M</i>        | <i>SD</i> | <i>M</i>          | <i>SD</i> |
| 1. Intention           | 5.23            | 1.87      | 4.99              | 1.92      |
| 2. Utility beliefs     | 5.38            | 1.57      | 5.23              | 1.68      |
| 3. Control beliefs     | 5.26            | 1.64      | 5.26              | 1.49      |
| 4. Social norm beliefs | 4.91            | 1.75      | 4.82              | 1.80      |
| 5. Moral norm beliefs  | 4.95            | 1.90      | 5.04              | 1.86      |
| 6. Sex                 | .27             | .45       | .34               | .51       |
| 7. K-COVID-19          | .70             | .67       | .66               | .66       |

**Supplementary Table 5**

*Direct effects, indirect effects and total effects in Study 1 and Study 2*

| N              | Variables  | Direct effect | Indirect effect | Total effect |
|----------------|------------|---------------|-----------------|--------------|
| <b>Study 1</b> |            |               |                 |              |
| 1              | U → I      | .458***       | -               | .458***      |
| 2              | S → I      | .246**        | -               | .246**       |
| 3              | C → I      | .271**        | -               | .271**       |
| 4              | Se → U     | -.008         | -               | -.008        |
| 5              | Se → S     | .061          | -               | .061         |
| 6              | Se → C     | .050          | -               | .050         |
| 7              | Se → I     | -.034         | -               | -.009        |
|                | Se → U → I | -             | -.004           | -            |
|                | Se → S → I | -             | .015            | -            |
|                | Se → C → I | -             | .014            | -            |
| 8              | O → U      | .176**        | -               | .176**       |
| 9              | O → S      | .154*         | -               | .154*        |
| 10             | O → C      | .070          | -               | .070         |
| 11             | O → I      | -.029         | -               | .108         |
|                | O → U → I  | -             | .081*           | -            |
|                | O → S → I  | -             | .038†           | -            |
|                | O → C → I  | -             | .019            | -            |
| 12             | E → U      | .176*         | -               | .176*        |
| 13             | E → S      | .156*         | -               | .156*        |
| 14             | E → C      | .245**        | -               | .245**       |
| 15             | E → I      | .012          | -               | .197**       |
|                | E → U → I  | -             | .080*           | -            |
|                | E → S → I  | -             | .038            | -            |
|                | E → C → I  | -             | .066*           | -            |
| 16             | Sx → E     | -.324***      | -               | -.324***     |
| 17             | Sx → U     | .116          | -               | .059         |
|                | Sx → E → U | -             | -.057†          | -            |
| 18             | Sx → S     | .091          | -               | .041         |

|                |                                                |         |        |         |
|----------------|------------------------------------------------|---------|--------|---------|
|                | $Sx \rightarrow E \rightarrow S$               | -       | -.050  | -       |
| 19             | $Sx \rightarrow C$                             | .081    | -      | .002    |
|                | $Sx \rightarrow E \rightarrow C$               | -       | -.079* | -       |
| 20             | $Sx \rightarrow I$                             | .001    | -      | .94     |
|                | $Sx \rightarrow E \rightarrow I$               | -       | -.004  | -       |
|                | $Sx \rightarrow U \rightarrow I$               | -       | .053   | -       |
|                | $Sx \rightarrow E \rightarrow U \rightarrow I$ | -       | -.026  | -       |
|                | $Sx \rightarrow S \rightarrow I$               | -       | .022   | -       |
|                | $Sx \rightarrow E \rightarrow S \rightarrow I$ | -       | -.012  | -       |
|                | $Sx \rightarrow C \rightarrow I$               | -       | .022   | -       |
|                | $Sx \rightarrow E \rightarrow C \rightarrow I$ | -       | -.021  | -       |
| <b>Study 2</b> |                                                |         |        |         |
| 1              | $S \rightarrow I$                              | .394*** | -      | .394*** |
| 2              | $C \rightarrow I$                              | .543*** | -      | .543*** |
| 3              | $G \rightarrow S$                              | -.009   | -      | -.009   |
| 4              | $G \rightarrow C$                              | -.044   | -      | -.044   |
| 5              | $G \rightarrow I$                              | .064*   | -      | .036    |
|                | $G \rightarrow S \rightarrow I$                | -       | -.004  | -       |
|                | $G \rightarrow C \rightarrow I$                | -       | -.024  | -       |
| 6              | $Sx \rightarrow S$                             | .088    | -      | .088    |
| 7              | $Sx \rightarrow C$                             | .089    | -      | .089    |
| 8              | $Sx \rightarrow I$                             | -.072*  | -      | .011    |
|                | $Sx \rightarrow S \rightarrow I$               | .-      | .035   | -       |
|                | $Sx \rightarrow C \rightarrow I$               | -       | .049   | -       |

*Note.* \* $p < .05$ , \*\* $p < .01$ , \*\*\* $p < .001$ ; † = 0.51/0.52; Sex was dummy coded as 0 = Female, 1 = Male  
U - Utility beliefs, C - Control Beliefs, S - Social norm beliefs, Se - Experimental manipulation: self, O - Experimental manipulation: others, E - Empathy, I - Vaccination Intention, Sx - Sex, G - Group
